# Supplementary material for: Characterization of CrufCSP1 and Its Potential Involvement in Host Location by Cotesia ruficrus (Hymenoptera: Braconidae), an Indigenous Parasitoid of Spodoptera frugiperda (Lepidoptera: Noctuidae) in China
Source: MDPI journal article supplement (doi:10.3390/insects14120920), 2023-12-01
Supplement: s1 [file s1]

### Supplementary Materials:

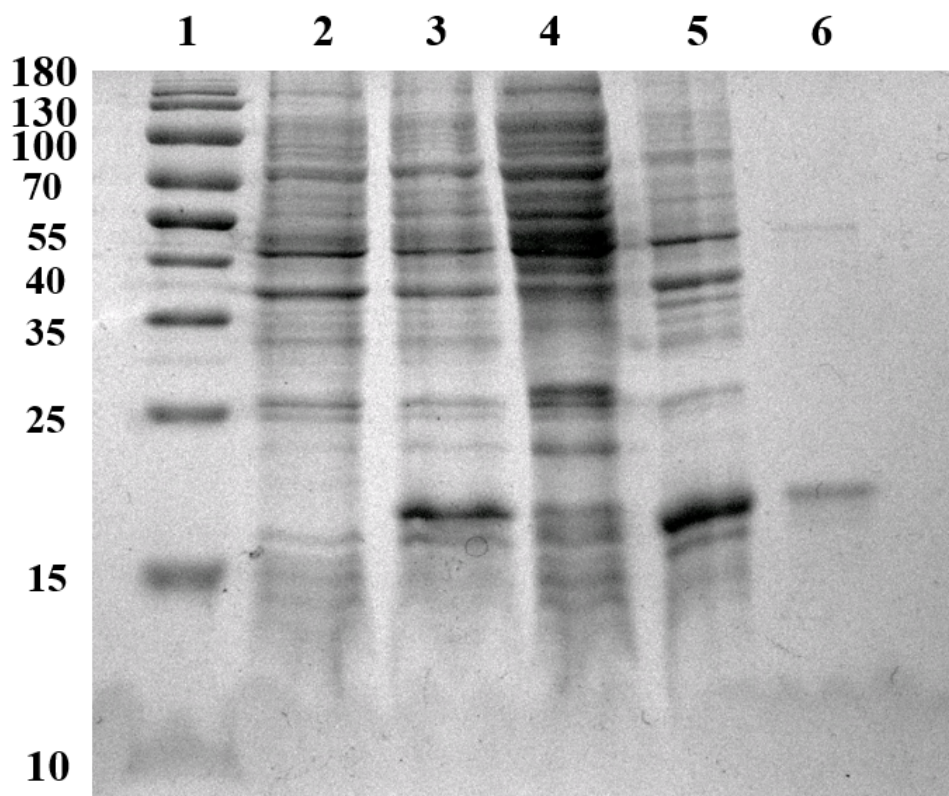

**Figure S1.** SDS-PAGE analysis for the expression and purification of CrufCSP1. M, protein marker; lane 1, non-induced PET30a/CrufCSP1 before IPTG induction; lane 2, IPTG-induced PET30a/CrufCSP1; lane 3, supernatant of induced PET30a/CrufCSP1; lane 4, sediment of induced PET30a/CrufCSP1; lane 5, purified CrufCSP1 with His-tag.

Program: ERRAT2  
File: csp456.pdb  
Chain#:A  
Overall quality factor\*\*: 100.000

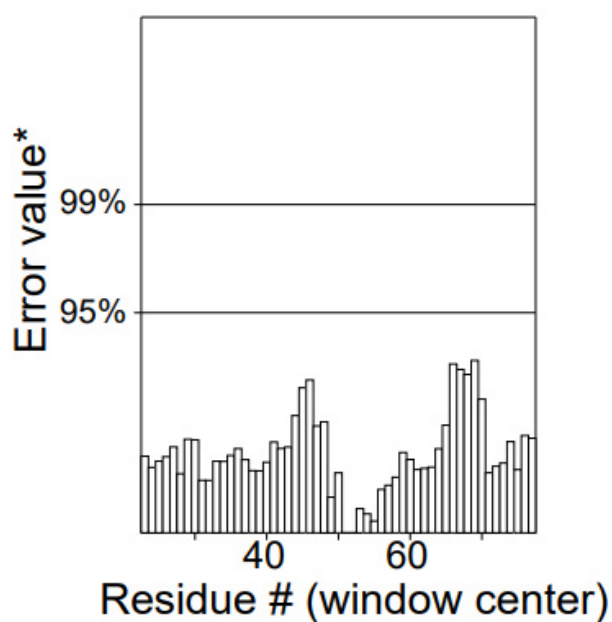

\*On the error axis, two lines are drawn to indicate the confidence with which it is possible to reject regions that exceed that error value.

\*\*Expressed as the percentage of the protein for which the calculated error value falls below the 95% rejection limit. Good high resolution structures generally produce values around 95% or higher. For lower resolutions (2.5 to 3Å) the average overall quality factor is around 91%.

**Figure S2.** ERRAT results of the constructed 3D model of CrufCSP1.

# Ramachandran Plot

saves

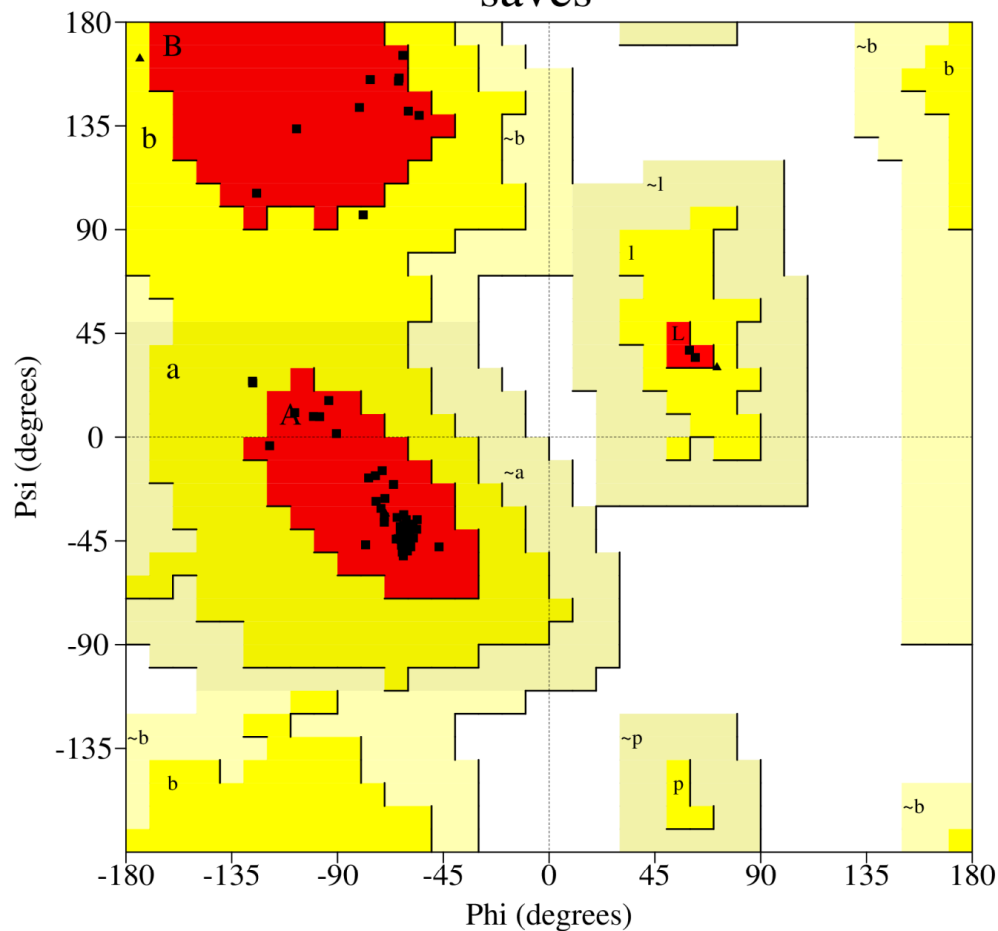

## Plot statistics

|                                                      |    |        |
|------------------------------------------------------|----|--------|
| Residues in most favoured regions [A,B,L]            | 52 | 94.5%  |
| Residues in additional allowed regions [a,b,l,p]     | 3  | 5.5%   |
| Residues in generously allowed regions [~a,~b,~l,~p] | 0  | 0.0%   |
| Residues in disallowed regions                       | 0  | 0.0%   |
| -----                                                |    |        |
| Number of non-glycine and non-proline residues       | 55 | 100.0% |
| Number of end-residues (excl. Gly and Pro)           | 2  |        |
| Number of glycine residues (shown as triangles)      | 4  |        |
| Number of proline residues                           | 2  |        |
| -----                                                |    |        |
| Total number of residues                             | 63 |        |

Based on an analysis of 118 structures of resolution of at least 2.0 Angstroms and R-factor no greater than 20%, a good quality model would be expected to have over 90% in the most favoured regions.

**Figure S3.** Ramachandran plot of the constructed 3D model of CrufCSP1.
